# Supplementary material for: Xrp1 genetically interacts with the ALS-associated FUS orthologue caz and mediates its toxicity
Source: PubMed Central journal article supplement (PMC6219715; doi:10.1083/jcb.201802151), 2018-11-05
Supplement: JCB_201802151_TableS1.pdf [file JCB_201802151_TableS1.pdf]

**TABLE S1: HUMAN HOMOLOGS OF XRP1**

| <b>Protein ID</b> | <b>Protein name</b>                                                       | <b>E-value with XRP1</b> |
|-------------------|---------------------------------------------------------------------------|--------------------------|
| XP_005258748.1    | protein fosB isoform X1                                                   | 1.1E-10                  |
| NP_004355.2       | CCAAT/enhancer-binding protein alpha isoform a                            | 1.5E-09                  |
| XP_011523007.1    | hepatic leukemia factor isoform X2                                        | 8.3E-09                  |
| XP_016868299.1    | cyclic AMP-responsive element-binding protein 5 isoform X5                | 0.00000011               |
| XP_016876460.1    | jun dimerization protein 2 isoform X1                                     | 0.00000038               |
| NP_005186.2       | CCAAT/enhancer-binding protein delta                                      | 0.00000059               |
| NP_001181986.1    | DNA damage-inducible transcript 3 protein isoform 2                       | 0.00000083               |
| NP_005243.1       | proto-oncogene c-Fos                                                      | 0.00000014               |
| XP_016881877.1    | D site-binding protein isoform X1                                         | 0.00000024               |
| NP_005429.1       | fos-related antigen 1 isoform 1                                           | 0.00000042               |
| NP_002117.1       | hepatic leukemia factor isoform 1                                         | 0.00000057               |
| NP_001254492.1    | cAMP-responsive element modulator isoform 24                              | 0.00000093               |
| XP_016859226.1    | fos-related antigen 2 isoform X3                                          | 0.0000013                |
| NP_004895.2       | cyclic AMP-responsive element-binding protein 5 isoform beta              | 0.0000019                |
| NP_877962.1       | cyclic AMP-dependent transcription factor ATF-4                           | 0.0000023                |
| NP_001343.2       | D site-binding protein                                                    | 0.0000023                |
| NP_919047.2       | cyclic AMP-responsive element-binding protein 3-like protein 2 isoform 1  | 0.0000025                |
| NP_005244.1       | fos-related antigen 2                                                     | 0.0000026                |
| XP_016883059.1    | nuclear factor interleukin-3-regulated protein-like                       | 0.0000037                |
| NP_002220.1       | transcription factor jun-B                                                | 0.0000050                |
| NP_005375.2       | nuclear factor interleukin-3-regulated protein                            | 0.0000085                |
| NP_061134.1       | basic leucine zipper transcriptional factor ATF-like 3                    | 0.000012                 |
| XP_016871216.1    | cAMP-responsive element modulator isoform X21                             | 0.000012                 |
| NP_612465.3       | basic leucine zipper transcriptional factor ATF-like 2 isoform 1          | 0.000012                 |
| NP_001073007.1    | X-box-binding protein 1 isoform XBP1(S)                                   | 0.000015                 |
| NP_001025458.1    | cyclic AMP-dependent transcription factor ATF-3 isoform 1                 | 0.000020                 |
| XP_005250598.1    | cyclic AMP-responsive element-binding protein 3-like protein 2 isoform X1 | 0.000021                 |
| NP_036200.2       | cyclic AMP-dependent transcription factor ATF-5                           | 0.000022                 |
| XP_006718443.1    | cyclic AMP-responsive element-binding protein 3-like protein 1 isoform X1 | 0.000023                 |
| NP_001243019.1    | cyclic AMP-dependent transcription factor ATF-2 isoform 1                 | 0.000024                 |
| NP_003207.1       | thyrotroph embryonic factor isoform 1                                     | 0.000025                 |
| NP_443086.1       | cyclic AMP-responsive element-binding protein 3-like protein 1            | 0.000030                 |
| NP_006390.1       | basic leucine zipper transcriptional factor ATF-like                      | 0.000031                 |
| NP_001123532.1    | cyclic AMP-dependent transcription factor ATF-7 isoform 3                 | 0.000034                 |
| XP_016878722.1    | transcription factor Maf isoform X1                                       | 0.000060                 |

|                |                                                                |          |
|----------------|----------------------------------------------------------------|----------|
| NP_001273897.1 | transcription factor jun-D isoform deltaJunD                   | 0.000065 |
| NP_004372.3    | cyclic AMP-dependent transcription factor ATF-6 beta isoform a | 0.000078 |
| XP_016874825.1 | cyclic AMP-dependent transcription factor ATF-1 isoform X3     | 0.000081 |
| XP_016858890.1 | cyclic AMP-responsive element-binding protein 1 isoform X8     | 0.00015  |
| NP_002219.1    | transcription factor AP-1                                      | 0.00016  |
| NP_002219.1    | transcription factor AP-1                                      | 0.00016  |
| NP_005452.2    | transcription factor MafB                                      | 0.00020  |
| NP_031374.2    | cyclic AMP-dependent transcription factor ATF-6 alpha          | 0.00025  |
| NP_874386.1    | cAMP-responsive element modulator isoform 4                    | 0.00029  |
| NP_001177.1    | transcription factor BACH1                                     | 0.00048  |
| XP_011521880.1 | transcription regulator protein MafG                           | 0.00048  |

Human homologs of Xrp1 (E-value < 0.001) ranked according to E-value. Homology detection was done with HHpred against the human proteome, using the default settings (three multiple-sequence alignment iterations with HHblits). Protein isoforms from the same gene were removed. All homologs are against the C-terminal, bZIP domain. None of the homologs contains an AT-hook motif.
