# Supplementary material for: Xrp1 genetically interacts with the ALS-associated FUS orthologue caz and mediates its toxicity
Source: PubMed Central journal article supplement (PMC6219715; doi:10.1083/jcb.201802151), 2018-11-05
Supplement: JCB_201802151_TableS6.pdf [file JCB_201802151_TableS6.pdf]

**TABLE S6: HUMAN GENES ENCODING AT-HOOK PROTEINS**

| Gene name | Ensembl Gene ID | Ensembl Protein ID | Chromosomal location | Upregulated in FUS mutant mice | FUS splice target | FUS RNA target | PMID references              |
|-----------|-----------------|--------------------|----------------------|--------------------------------|-------------------|----------------|------------------------------|
| AHCTF1    | ENSG00000153207 | ENSP00000355464    | Chr 1 q44            |                                |                   | Yes            | 24204307, 22081015           |
| AHDC1     | ENSG00000126705 | ENSP00000247087    | Chr 1 p36.11         |                                |                   |                |                              |
| ASH1L     | ENSG00000116539 | ENSP00000357330    | Chr 1 q22            |                                |                   | Yes            | 24204307, 22081015           |
| ELF3      | ENSG00000163435 | ENSP00000352673    | Chr 1 q32.1          | Yes                            |                   |                | 27368346                     |
| FAM171B   | ENSG00000144369 | ENSP00000304108    | Chr 2 q32.1          |                                |                   | Yes            | 22081015, 22427648           |
| BOD1L1    | ENSG00000038219 | ENSP00000040738    | Chr 4 p15.33         |                                |                   |                |                              |
| HMGA1     | ENSG00000137309 | ENSP00000363230    | Chr 6 p21.31         |                                |                   | Yes            | 22081015                     |
| SCML4     | ENSG00000146285 | ENSP00000358018    | Chr 6 q21            |                                | Yes               |                | 25907258                     |
| ZBTB24    | ENSG00000112365 | ENSP00000230122    | Chr 6 q21            |                                |                   |                |                              |
| KMT2C     | ENSG00000055609 | ENSP00000262189    | Chr 7 q36.1          |                                |                   |                |                              |
| KMT2A     | ENSG00000118058 | ENSP00000436786    | Chr 11 q23.3         |                                |                   |                |                              |
| PHF21A    | ENSG00000135365 | ENSP00000323152    | Chr 11 p11.2         |                                |                   | Yes            | 22081015                     |
| BAZ2A     | ENSG00000076108 | ENSP00000448760    | Chr 12 q13.3         |                                | Yes               | Yes            | 23023293, 22081015           |
| HMGA2     | ENSG00000149948 | ENSP00000384026    | Chr 12 q14.3         |                                |                   | Yes            | 22081015                     |
| PDS5B     | ENSG00000083642 | ENSP00000313851    | Chr 13 q13.1         |                                |                   | Yes            | 24204307, 22081015           |
| SRCAP     | ENSG00000080603 | ENSP00000262518    | Chr 16 p11.2         |                                | Yes               | Yes            | 25907258, 22081015           |
| GLYR1     | ENSG00000140632 | ENSP00000390276    | Chr 16 p13.3         |                                |                   | Yes            | 22081015                     |
| CBX2      | ENSG00000262762 | ENSP00000460115    | Chr 17 q25.3         | Yes                            |                   | Yes            | 23023293, 22081015           |
| SETBP1    | ENSG00000152217 | ENSP00000282030    | Chr 18 q12.3         |                                |                   | Yes            | 22081015                     |
| DOT1L     | ENSG00000104885 | ENSP00000381657    | Chr 19 p13.3         | Yes                            |                   | Yes            | 23023293, 24204307, 22081015 |
| PRR12     | ENSG00000126464 | ENSP00000394510    | Chr 19 q13.33        | Yes                            |                   | Yes            | 27368346, 22081015           |
| ZNF524    | ENSG00000171443 | ENSP00000301073    | Chr 19 q13.42        |                                |                   |                |                              |
| ZNF653    | ENSG00000161914 | ENSP00000293771    | Chr 19 p13.2         |                                |                   |                |                              |
| KMT2B     | ENSG00000272333 | ENSP00000398837    | Chr 19 q13.12        | Yes                            |                   |                | 27368346                     |
| PHF20     | ENSG00000025293 | ENSP00000363124    | Chr 20 q11.22        |                                |                   | Yes            | 22081015                     |
| PATZ1     | ENSG00000100105 | ENSP00000266269    | Chr 22 q12.2         |                                |                   |                |                              |
| MECP2     | ENSG00000169057 | ENSP00000301948    | Chr X q28            |                                |                   | Yes            | 22081015, 23023293           |
