# Supplementary material for: Xrp1 genetically interacts with the ALS-associated FUS orthologue caz and mediates its toxicity
Source: PubMed Central journal article supplement (PMC6219715; doi:10.1083/jcb.201802151), 2018-11-05
Supplement: JCB_201802151_TableS7.pdf [file JCB_201802151_TableS7.pdf]

**TABLE S7: NAME, SEQUENCE, AND PURPOSE OF OLIGONUCLEOTIDE PRIMERS USED IN THIS STUDY**

| Primer name        | Sequence (5' to 3')                                        | Purpose                                                      |
|--------------------|------------------------------------------------------------|--------------------------------------------------------------|
| Xrp Del FW1        | GCGCAGTTTCTTCCAGCGAC                                       | Verification of <i>Xrp1<sup>Ex-long</sup></i>                |
| Xrp Del FW2        | TCAAGGCCAATCGCAAAGTG                                       |                                                              |
| Xrp Del REV1       | CGGCGCAACAAGTTAGAAGG                                       |                                                              |
| Xrp Del REV2       | ACACCTCTTAACGCTGCAAC                                       |                                                              |
| CG14291 Del FW1    | GTGCGTCCAGATTGGGAGTTTG                                     | Verification of <i>Df(3R)Xrp1<sup>Plus</sup></i>             |
| CG14291 Del FW2    | CCGAGGTGAAGGCGTTGTTG                                       |                                                              |
| CG42613 Del REV1   | TGTA CTTCGGAGCCCGTTTCG                                     |                                                              |
| CG42613 Del REV2   | TTATACTCCTCGTCGGCAAC                                       |                                                              |
| Xrp1 Long EagI FW  | GCTACGGCCGATGATCCAGGAGCCAGC                                | Generation of Xrp1 <sup>Long</sup>                           |
| Xrp1 short NotI FW | GCTAGCGGCCGCATGTTTGCCGAGGAGGATC                            | Generation of Xrp1 <sup>Short</sup>                          |
| Xrp1 XhoI REV      | GCTACTCGAGTCAGTCCTGCTCCTGCTTA                              | Generation of Xrp1 <sup>Long</sup> and Xrp1 <sup>Short</sup> |
| caz FW             | CAACGACATGATCACCCAGG                                       | Quantitation of caz mRNA                                     |
| caz REV            | CATTGGTGTCGTCGTAGGTG                                       |                                                              |
| Xrp1 Sh Junc FW1   | ATGATCGGTTTCGAGGCTCC                                       | Quantitation of total Xrp1 mRNA                              |
| Xrp1 Sh Junc REV1  | ATCCTCTACGATGTCTGCATGG                                     |                                                              |
| Xrp1 Long FW       | TTGAAGAGATAGACGTTCCGGTG                                    | Quantitation of Xrp1 Long mRNA                               |
| Xrp1 Long REV      | AGATCCTCCTCGGCAAACATG                                      |                                                              |
| rp49 FW            | CCAGTCGGATCGATATGCTAA                                      | Quantitation of rp49 control mRNA                            |
| rp49 REV           | ACCGTTGGGGTTGGTGAG                                         |                                                              |
| EifTuM FW          | CATGTCCTTCATCCAACCTGCA                                     | Quantitation of EifTuM control mRNA                          |
| EifTuM REV         | AATGAGCTTGGTGTCTTCGCC                                      |                                                              |
| Xrp1_LHA_FW        | AGTCAAGCTTCAAACGTCGTGAGACAGTTTGAACAGCTGTT<br>GCAACGTGTGG   | Amplification of left homology arm for Xrp1 gene targeting   |
| Xrp1_LHA_REV       | AGTCGAATTCAGTATTGTTACTAACTGACTCAACTGCGAGC                  |                                                              |
| Xrp1_RHA_FW        | AGTCGAATTCCTAGCCATAGAATAGAAATTGCGGAGC                      | Amplification of right homology arm for Xrp1 gene targeting  |
| Xrp1_RHA_Rev       | AGTCGGTACCATTACCCTGTTATCCCTAGCAGCAGGCGTAAA<br>TGTAATCCTTGC |                                                              |
